# Supplementary material for: Middle-Scale Ionospheric Disturbances Observed by the Oblique-Incidence Ionosonde Detection Network in North China after the 2011 Tohoku Tsunamigenic Earthquake
Source: MDPI journal article supplement (doi:10.3390/s21031000), 2021-02-02
Supplement: s1 [file s1]

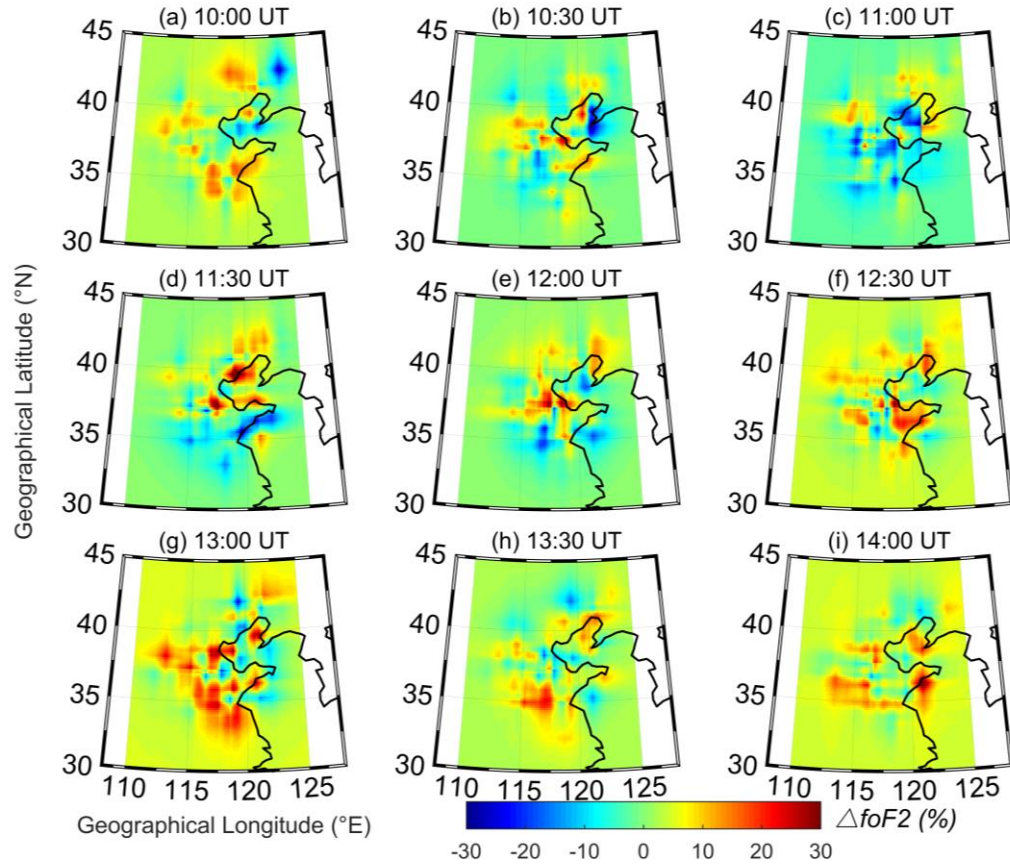

**Figure S1.** (a)–(i) Time sequences of two-dimensional  $\Delta f^\circ F2$  maps recorded from 10:00 UT to 14:00 UT on 9 March 2011 with a 30-min step.

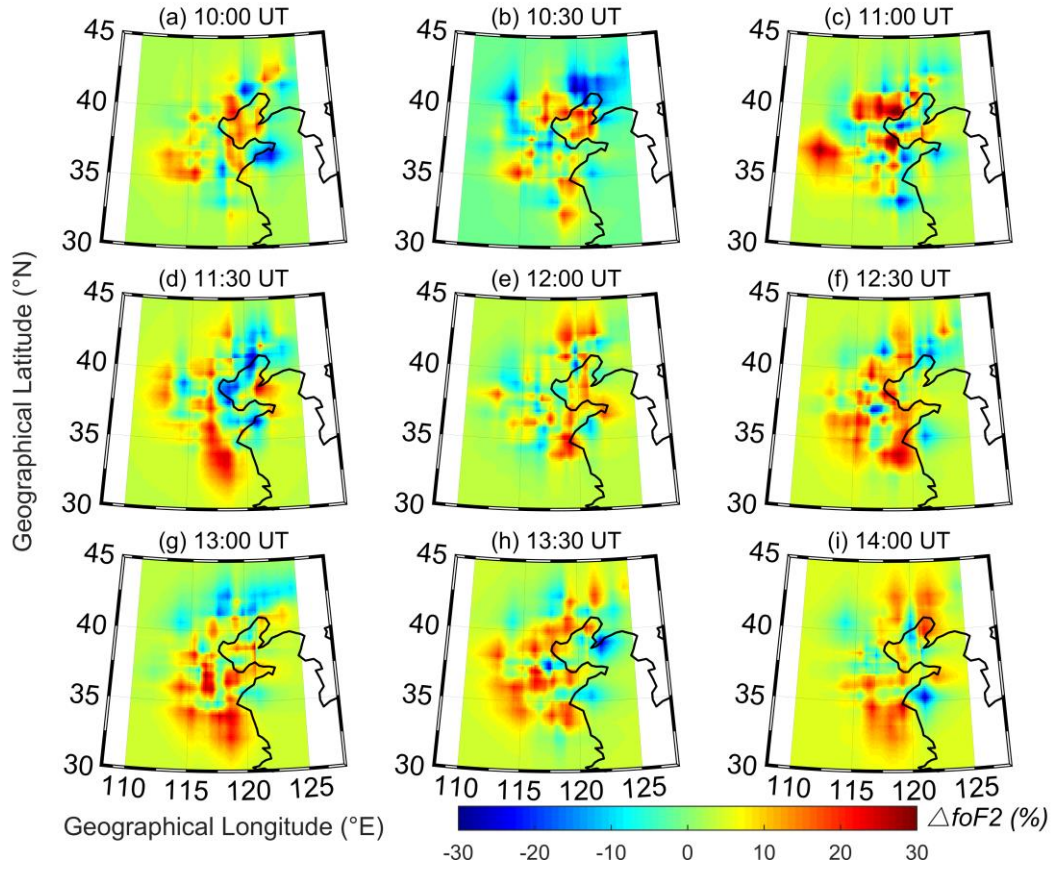

**Figure S2.** Same as Figure S1, (a)–(i) Time sequences of two-dimensional  $\Delta f_o F_2$  maps recorded from 10:00 UT to 14:00 UT on 9 March 2011 with a 30-min step, but for the two-dimensional  $\Delta f_o F_2$  variations on 10 March 2011.
